# Supplementary material
Source: MDPI journal article supplement (https://www.mdpi.com/2543-6031/91/5/33)
Supplement: s1 [file s1]

**Table S1. Distribution of different groups of lung transplant patients to quality-of-life categories in the extended EuroQol 5D/5L questionnaire**

| All patients                                                                                                                                                                                                                      | No CLAD                                                                                                                                                                                                                           | CLAD                                                                                                                                                                                                                                      | BOS / undefined / unclassified                                                                                                                                                                                                     | RAS / mixed                                                                                                                                                                                                                       |
|-----------------------------------------------------------------------------------------------------------------------------------------------------------------------------------------------------------------------------------|-----------------------------------------------------------------------------------------------------------------------------------------------------------------------------------------------------------------------------------|-------------------------------------------------------------------------------------------------------------------------------------------------------------------------------------------------------------------------------------------|------------------------------------------------------------------------------------------------------------------------------------------------------------------------------------------------------------------------------------|-----------------------------------------------------------------------------------------------------------------------------------------------------------------------------------------------------------------------------------|
| <b>Median EQ5D Score (n=909): 95</b>                                                                                                                                                                                              | <b>Median EQ5D Score (n=734): 95</b>                                                                                                                                                                                              | <b>Median EQ5D Score (n=175): 85</b>                                                                                                                                                                                                      | <b>Median EQ5D Score (n=136): 88</b>                                                                                                                                                                                               | <b>Median EQ5D Score (n=39): 75</b>                                                                                                                                                                                               |
| <b>Mobility (n=915)</b><br>No Problems 70.3%<br>Slight Problems 10.7%<br>Moderate Problems 15.7%<br>Severe Problems 3.1%<br>Unable 0.2%                                                                                           | <b>Mobility (n=737)</b><br>No Problems 76.1%<br>Slight Problems 10.6%<br>Moderate Problems 11.0%<br>Severe Problems 2.2%<br>Unable 0.1%                                                                                           | <b>Mobility (n=178)</b><br>No Problems 46.1%<br>Slight Problems 11.2%<br>Moderate Problems 35.4%<br><b>Severe Problems 6.7%</b><br>Unable 0.6%                                                                                            | <b>Mobility (n=137)</b><br>No Problems 51.1%<br>Slight Problems 11.7%<br>Moderate Problems 29.2%<br>Severe Problems 7.3%<br>Unable 0.7%                                                                                            | <b>Mobility (n=41)</b><br>No Problems 29.3%<br>Slight Problems 9.8%<br>Moderate Problems 56.1%<br>Severe Problems 4.9%<br>Unable 0.0%                                                                                             |
| <b>Self-care (n=914)</b><br>No Problems 83.2%<br>Slight Problems 7.1%<br>Moderate Problems 8.4%<br>Severe Problems 0.8%<br>Unable 0.5%                                                                                            | <b>Self-care (n=736)</b><br>No Problems 86.7%<br>Slight Problems 7.1%<br>Moderate Problems 5.8%<br>Severe Problems 0.3%<br>Unable 0.1%                                                                                            | <b>Self-care (n=178)</b><br>No Problems 68.5%<br>Slight Problems 7.3%<br>Moderate Problems 19.1%<br><b>Severe Problems 2.8%</b><br>Unable 2.2%                                                                                            | <b>Self-care (n=137)</b><br>No Problems 72.3%<br>Slight Problems 5.1%<br>Moderate Problems 17.5%<br>Severe Problems 2.9%<br>Unable 2.2%                                                                                            | <b>Self-care (n=41)</b><br>No Problems 56.1%<br>Slight Problems 14.6%<br>Moderate Problems 24.4%<br>Severe Problems 2.4%<br>Unable 2.4%                                                                                           |
| <b>Usual Activities (n=912)</b><br>No Problems 67.0%<br>Slight Problems 14.5%<br>Moderate Problems 14.9%<br>Severe Problems 2.0%<br>Unable 1.6%                                                                                   | <b>Usual Activities (n=735)</b><br>No Problems 71.6%<br>Slight Problems 15.0%<br>Moderate Problems 11.4%<br>Severe Problems 1.4%<br>Unable 0.7%                                                                                   | <b>Usual Activities (n=177)</b><br>No Problems 48.0%<br>Slight Problems 12.4%<br>Moderate Problems 29.4%<br>Severe Problems 4.5%<br>Unable 5.6%                                                                                           | <b>Usual Activities (n=137)</b><br>No Problems 50.4%<br>Slight Problems 11.7%<br>Moderate Problems 27.7%<br>Severe Problems 5.8%<br>Unable 4.4%                                                                                    | <b>Usual Activities (n=40)</b><br>No Problems 40.0%<br>Slight Problems 15.0%<br>Moderate Problems 35.0%<br>Severe Problems 0.0%<br>Unable 10.0%                                                                                   |
| <b>Pain / Discomfort (n=914)</b><br>No Pain / Discomfort 54.5%<br>Slight Pain / Discomfort 22.2%<br>Moderate Pain / Discomfort 17.8%<br>Severe Pain / Discomfort 4.0%<br>Extreme Pain / Discomfort 1.4%                           | <b>Pain / Discomfort (n=736)</b><br>No Pain / Discomfort 55.7%<br>Slight Pain / Discomfort 23.8%<br>Moderate Pain / Discomfort 15.8%<br>Severe Pain / Discomfort 3.5%<br>Extreme Pain / Discomfort 1.2%                           | <b>Pain / Discomfort (n=178)</b><br>No Pain / Discomfort 49.4%<br>Slight Pain / Discomfort 15.7%<br>Moderate Pain / Discomfort 26.4%<br>Severe Pain / Discomfort 6.2%<br>Extreme Pain / Discomfort 2.2%                                   | <b>Pain / Discomfort (n=137)</b><br>No Pain / Discomfort 51.8%<br>Slight Pain / Discomfort 15.3%<br>Moderate Pain / Discomfort 24.1%<br>Severe Pain / Discomfort 7.3%<br>Extreme Pain / Discomfort 1.5%                            | <b>Pain / Discomfort (n=41)</b><br>No Pain / Discomfort 41.5%<br>Slight Pain / Discomfort 17.1%<br>Moderate Pain / Discomfort 34.1%<br>Severe Pain / Discomfort 2.4%<br>Extreme Pain / Discomfort 4.9%                            |
| <b>Anxiety / Depression (n=911)</b><br>Not anxious or depressed 76.1%<br>Slightly anxious or depressed 14.1%<br>Moderately anxious or depressed 8.7%<br>Severely anxious or depressed 0.8%<br>Extremely anxious or depressed 0.4% | <b>Anxiety / Depression (n=735)</b><br>Not anxious or depressed 78.6%<br>Slightly anxious or depressed 14.0%<br>Moderately anxious or depressed 6.5%<br>Severely anxious or depressed 0.4%<br>Extremely anxious or depressed 0.4% | <b>Anxiety / Depression (n=176)</b><br>Not anxious or depressed 65.3%<br>Slightly anxious or depressed 14.2%<br>Moderately anxious or depressed 17.6%<br><b>Severely anxious or depressed 2.3%</b><br>Extremely anxious or depressed 0.6% | <b>Anxiety / Depression (n=136)</b><br>Not anxious or depressed 67.6%<br>Slightly anxious or depressed 12.5%<br>Moderately anxious or depressed 17.6%<br>Severely anxious or depressed 2.2%<br>Extremely anxious or depressed 0.0% | <b>Anxiety / Depression (n=40)</b><br>Not anxious or depressed 57.5%<br>Slightly anxious or depressed 20.0%<br>Moderately anxious or depressed 17.5%<br>Severely anxious or depressed 2.5%<br>Extremely anxious or depressed 2.5% |
| <b>Flights of Stairs (n=1022)</b><br>> 2 Flights of Stairs 48.4%<br>2 Flights of Stairs 22.9%<br>1 Flights of stairs 19.6%<br>No Flights of stairs 9.1%                                                                           | <b>Flights of Stairs (n=782)</b><br>> 2 Flights of Stairs 57.5%<br>2 Flights of Stairs 23.5%<br>1 Flights of stairs 14.8%<br>No Flights of stairs 4.1%                                                                            | <b>Flights of Stairs (n=240)</b><br>> 2 Flights of Stairs 18.8%<br>2 Flights of Stairs 20.8%<br>1 Flights of stairs 35.0%<br>No Flights of stairs 25.4%                                                                                   | <b>Flights of Stairs (n=170)</b><br>> 2 Flights of Stairs 24.4%<br>2 Flights of Stairs 20.6%<br>1 Flights of stairs 33.5%<br>No Flights of stairs 21.8%                                                                            | <b>Flights of Stairs (n=70)</b><br>> 2 Flights of Stairs 5.7%<br>2 Flights of Stairs 21.4%<br>1 Flights of stairs 38.6%<br>No Flights of stairs 34.3%                                                                             |
| <b>Rollator/wheelchair (n=1023)</b><br>No 94.7%<br>Yes 5.3%                                                                                                                                                                       | <b>Rollator/wheelchair (n=782)</b><br>No 96.7%<br>Yes 3.3%                                                                                                                                                                        | <b>Rollator/wheelchair (n=241)</b><br>No 88.4%<br><b>Yes 11.6%</b>                                                                                                                                                                        | <b>Rollator/wheelchair (n=171)</b><br>No 90.6%<br>Yes 9.4%                                                                                                                                                                         | <b>Rollator/wheelchair (n=70)</b><br>No 82.9%<br>Yes 17.1%                                                                                                                                                                        |
